# Supplementary material for: Cork-derived hierarchically porous hydroxyapatite with different stoichiometries for biomedical and environmental applications
Source: Royal Society of Chemistry journal article supplement (doi:10.1039/d1qm00584g), 2021-01-01
Supplement: d1qm00584g1.pdf [file d1qm00584g1.pdf]

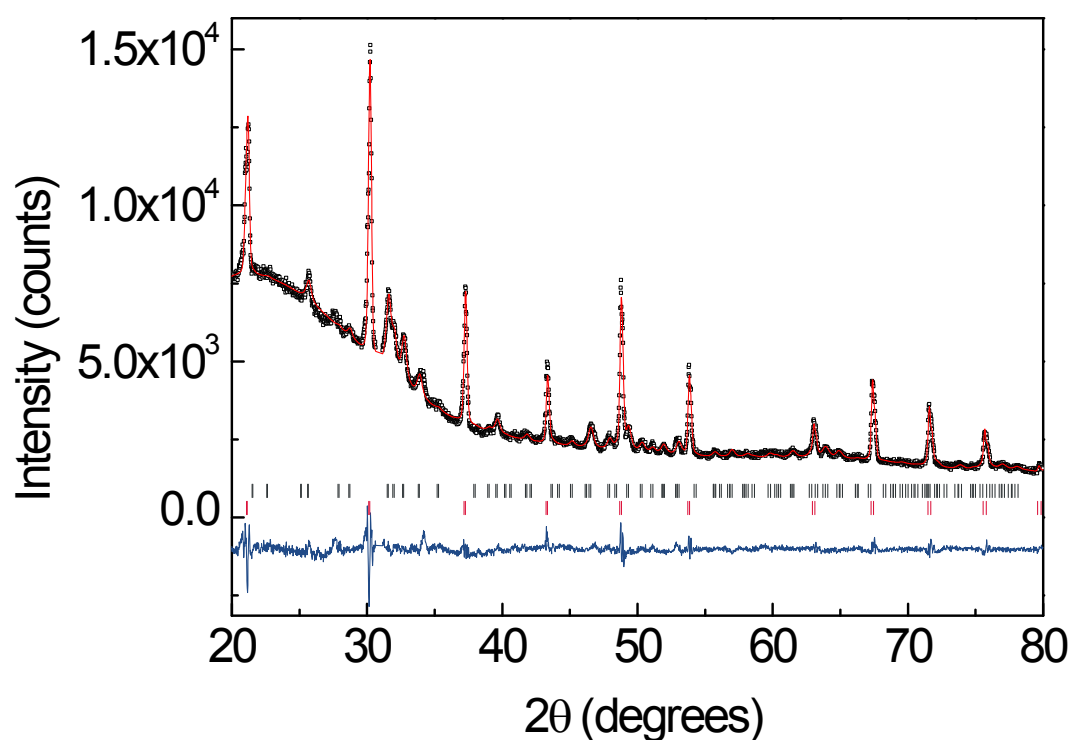

Figure S11. Graphic output of the Rietveld refinement of **CDHA\_700**. The black open squares represent the observed pattern, the continuous red line represents the calculated pattern, and the difference curve between observed and calculated profiles is plotted below (continuous blue line). The small vertical bars indicate the position of reflections (black: HAp; red: LaB6, the internal standard – NIST 660b).

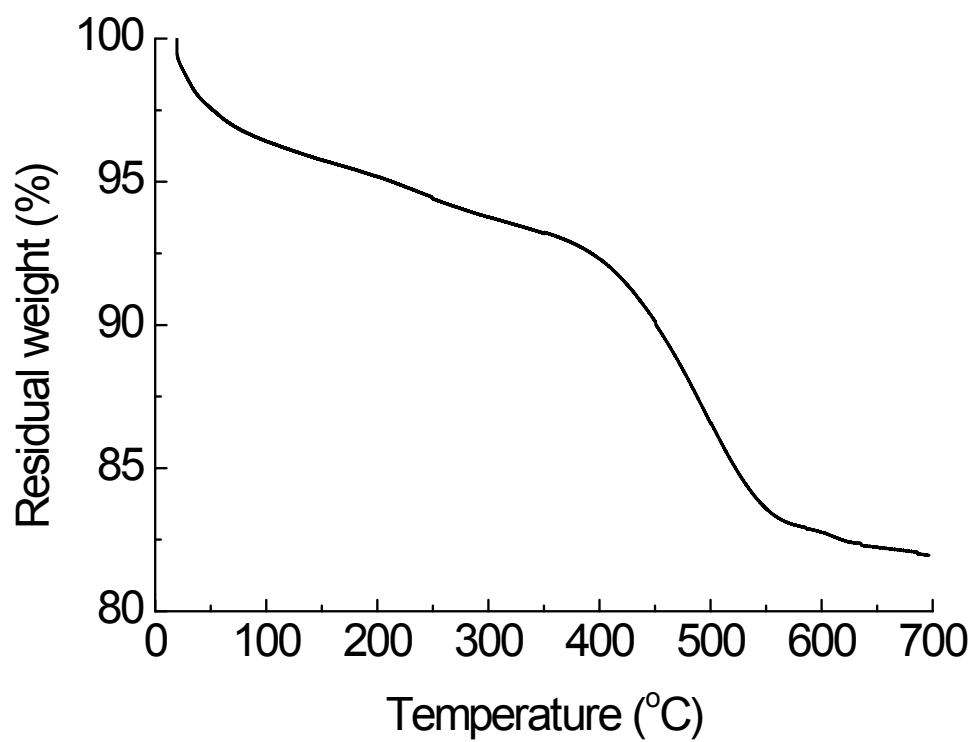

Figure SI2. TGA curve for sample **HA\_16**.

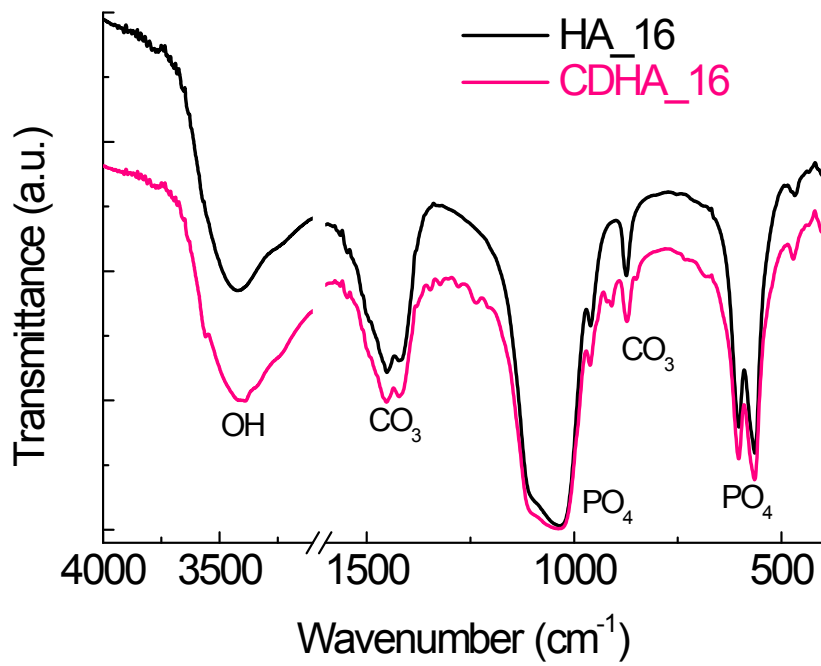

Figure SI3. FTIR spectra of the samples **HA\_16** and **CDHA\_16**.
